# Supplementary material for: (ADP-ribosyl)hydrolases: Structural Basis for Differential Substrate Recognition and Inhibition
Source: PubMed Central journal article supplement (PMC6309922; doi:10.1016/j.chembiol.2018.11.001), 2018-12-20

# Data S1. NMR spectra concerning the synthesis of ADP-HPM (Related to STAR\*Methods)

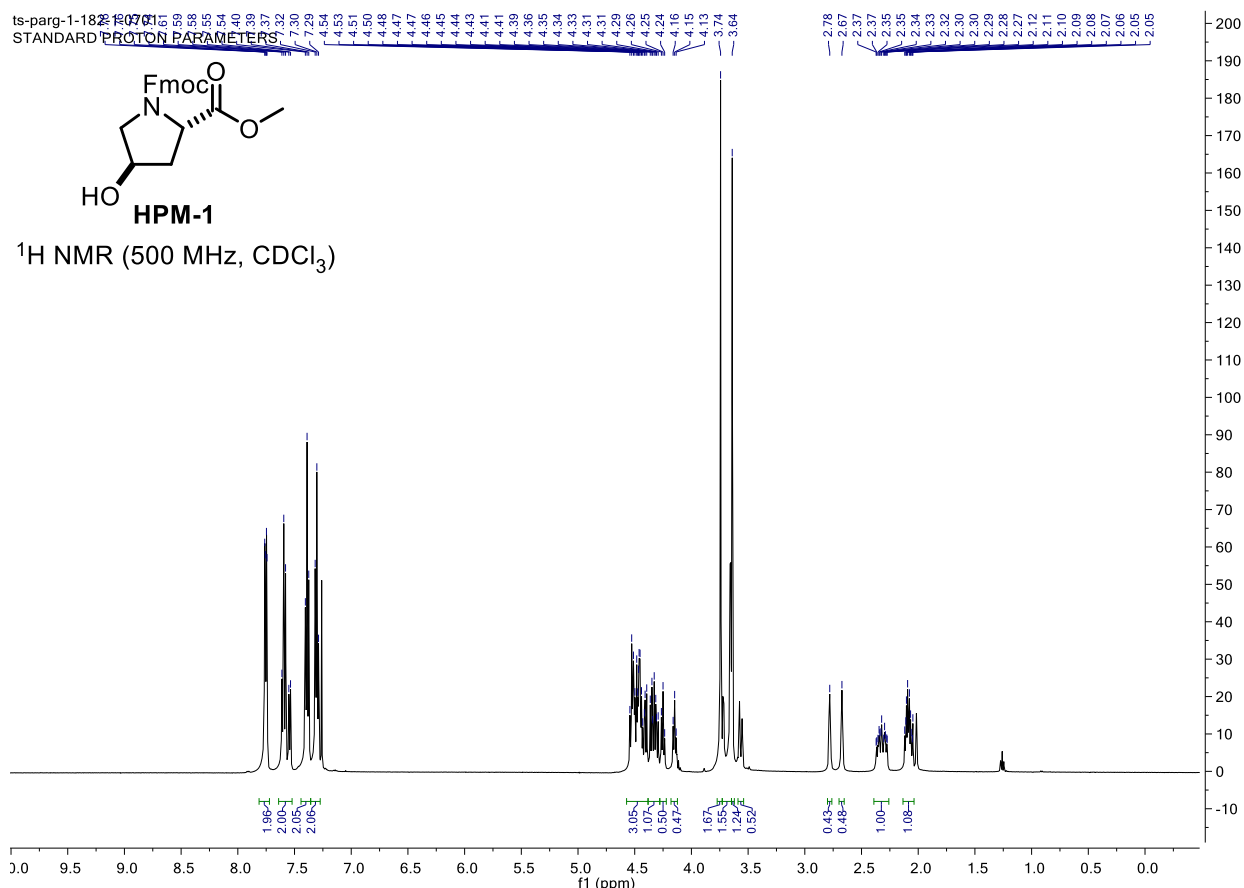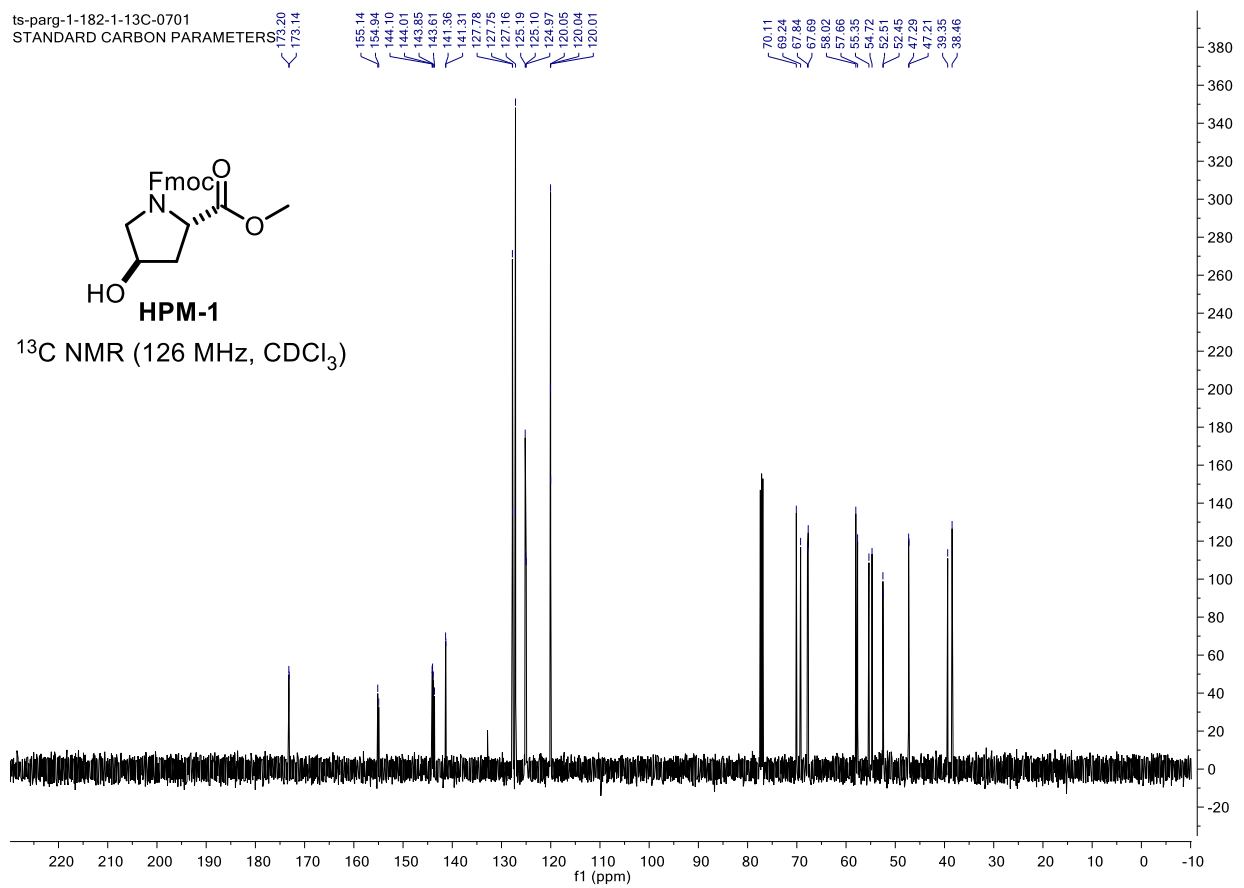

ts-parg-1-184-13C-0701  
STANDARD PROTON PARAMETERS

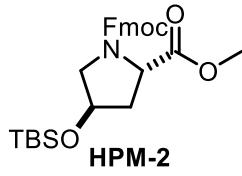

<sup>13</sup>C NMR (126 MHz, CDCl<sub>3</sub>)

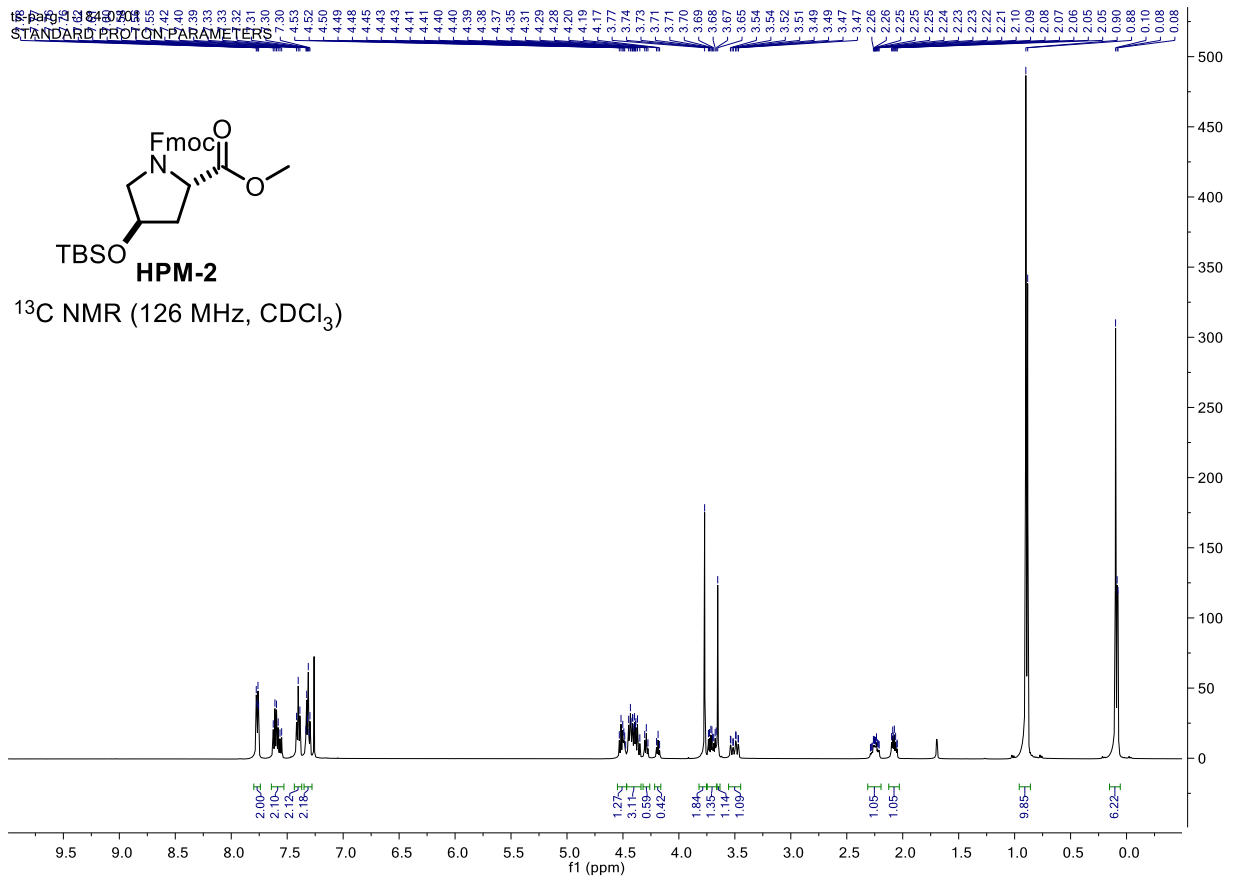

ts-parg-1-184-13C-0701  
STANDARD CARBON PARAMETERS

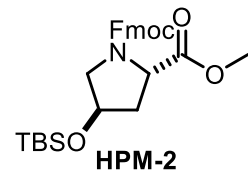

<sup>1</sup>H NMR (500 MHz, CDCl<sub>3</sub>)

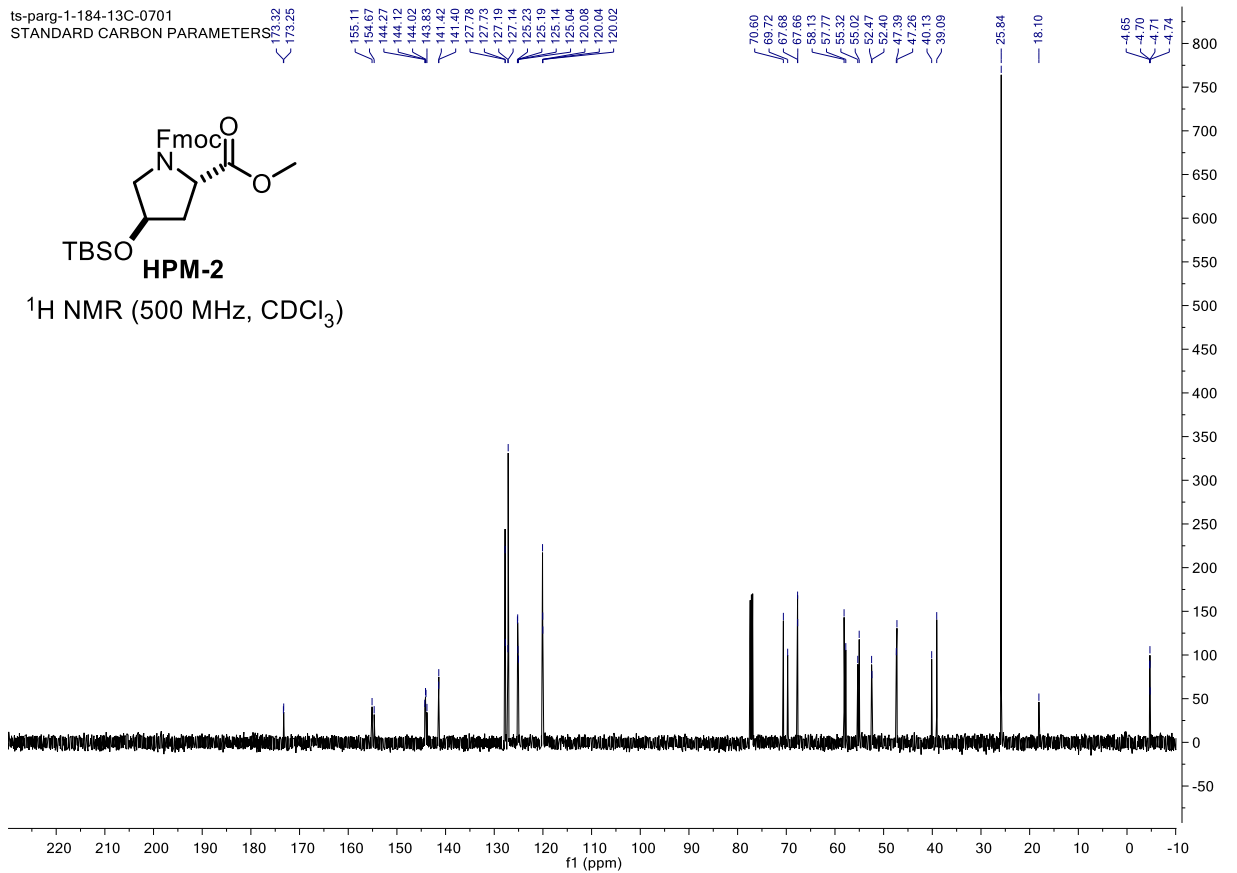

ts-parg-1-186-0701  
STANDARD PROTON PARAMETERS

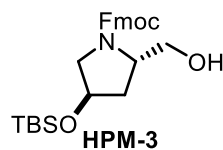

<sup>13</sup>C NMR (126 MHz, CDCl<sub>3</sub>)

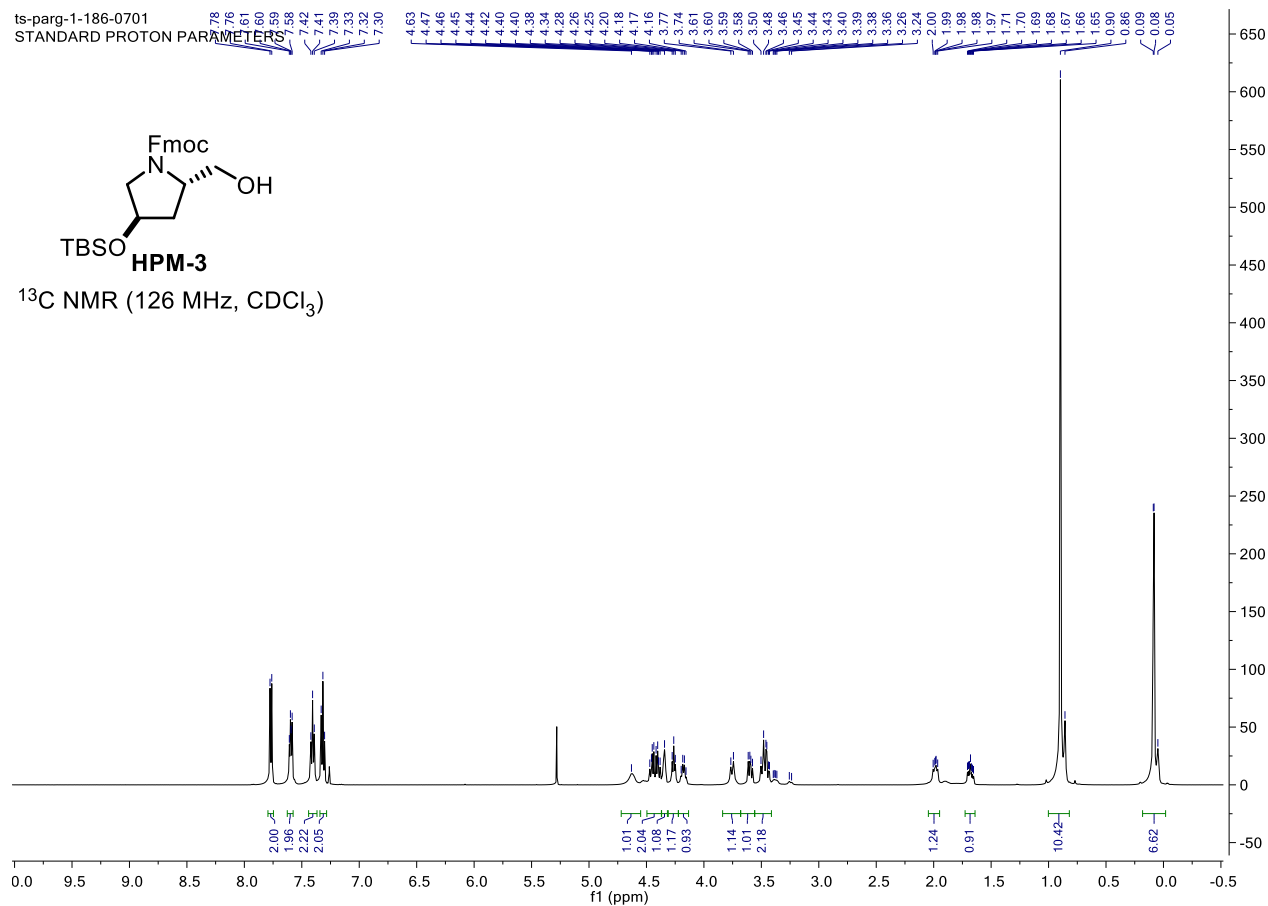

ts-parg-1-186-13C-0701  
STANDARD CARBON PARAMETERS

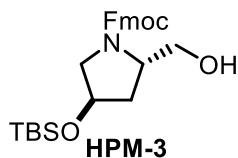

<sup>1</sup>H NMR (500 MHz, CDCl<sub>3</sub>)

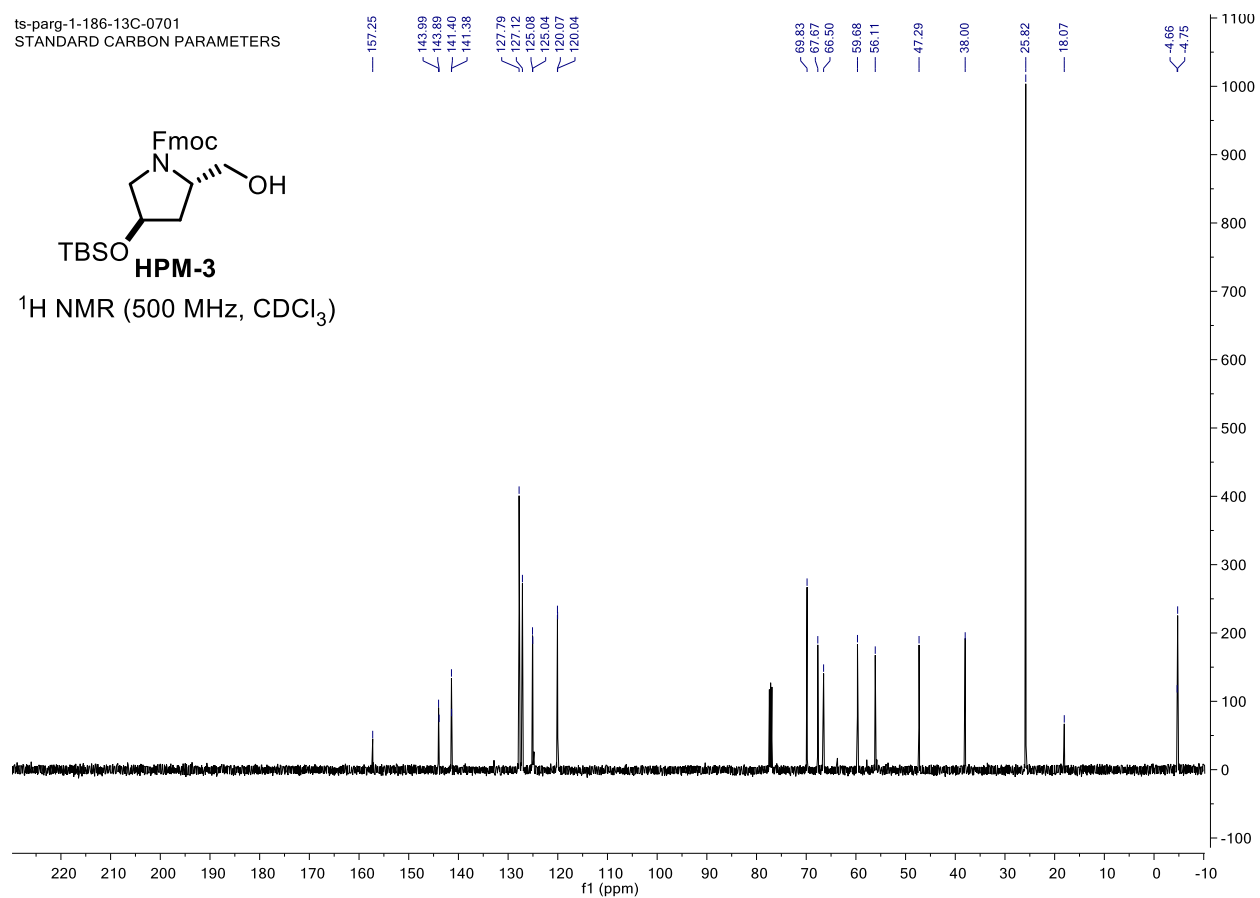

ts-parg-2-142-1  
STANDARD PROTON PARAMETERS

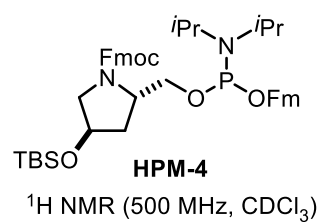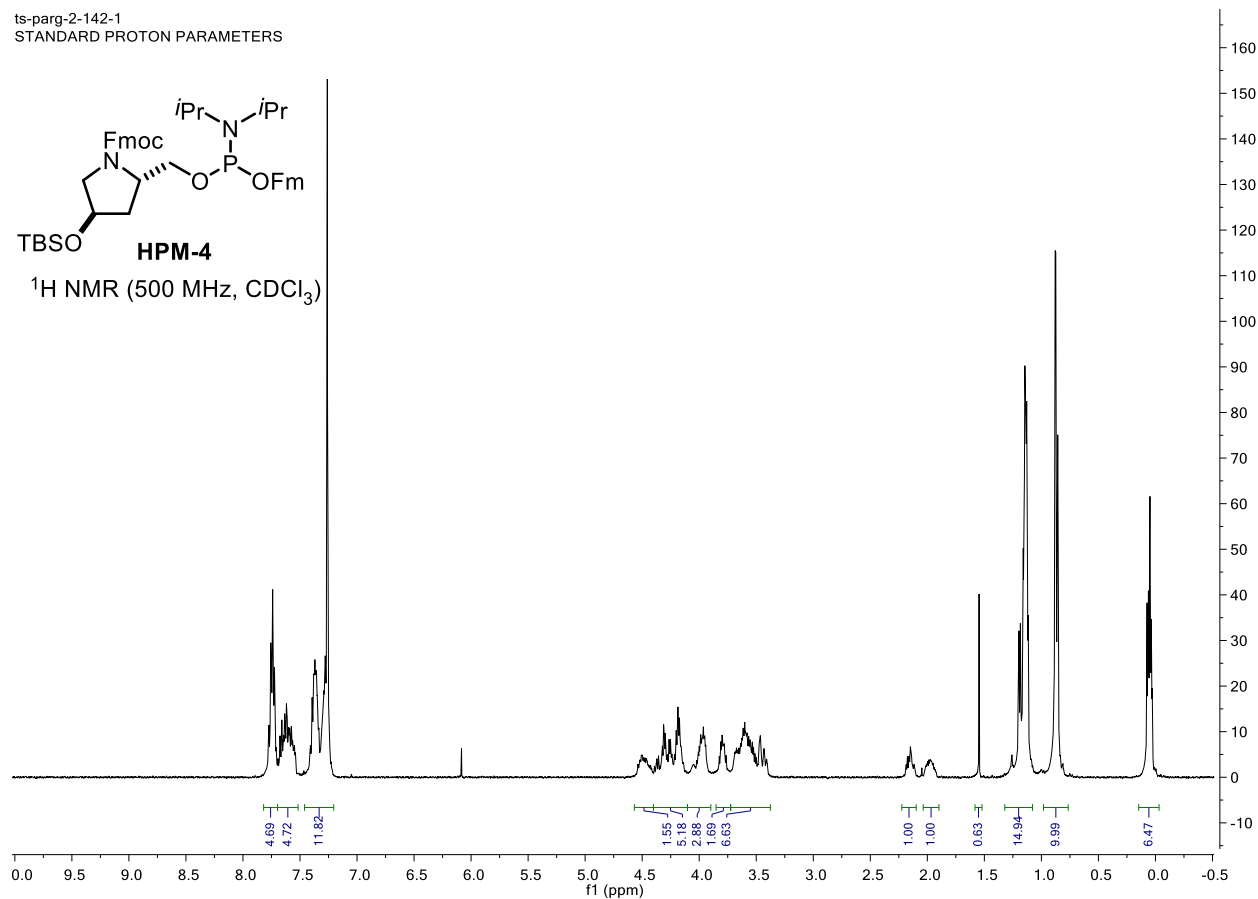

STANDARD CARBON PARAMETERS

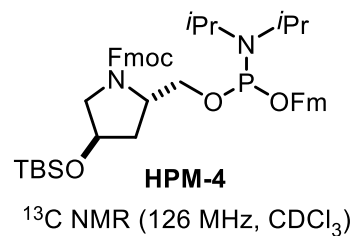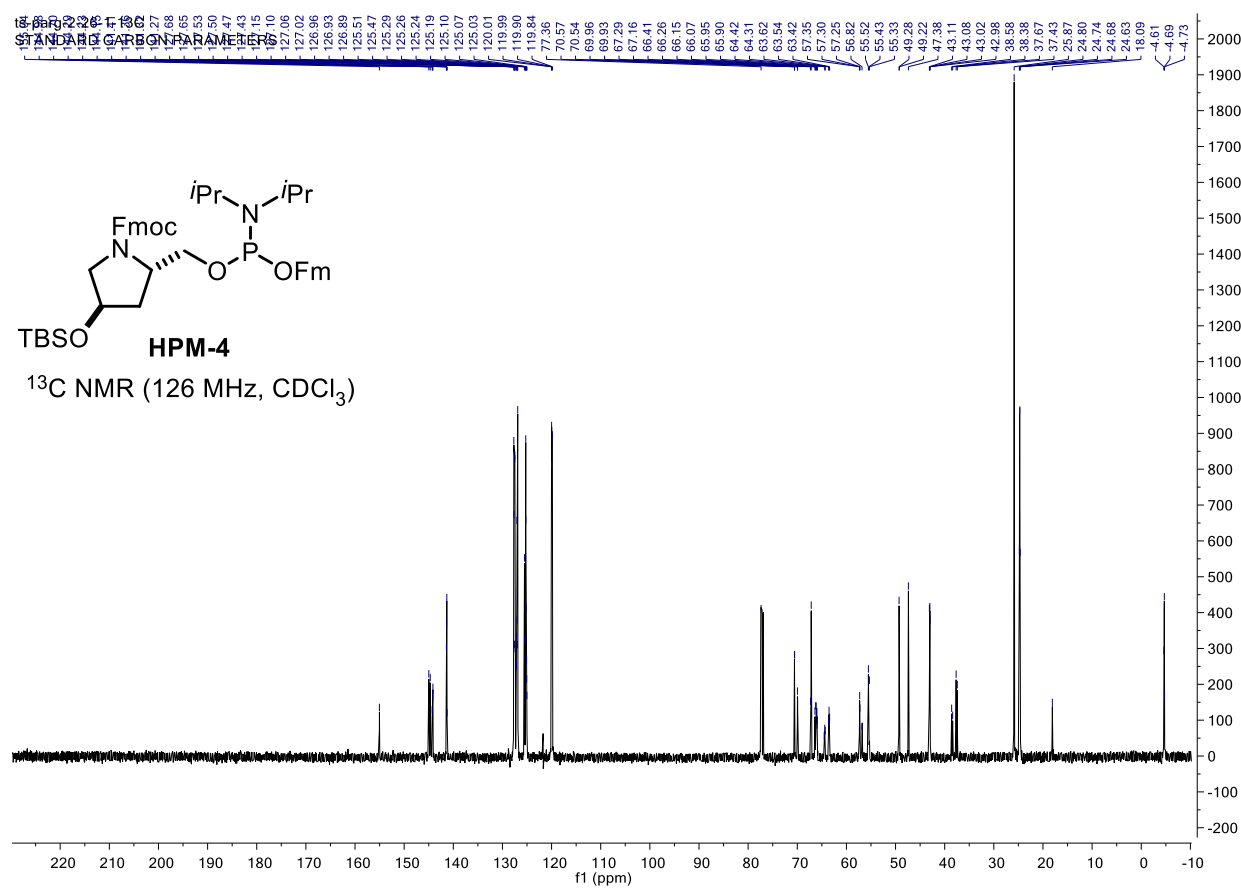

ts-parg-2-26-1-31P  
P31 TRIPHENYLPHOSPHATE PARAMETERS

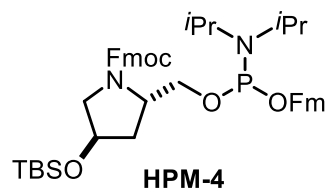

<sup>31</sup>P NMR (202 MHz, CDCl<sub>3</sub>)

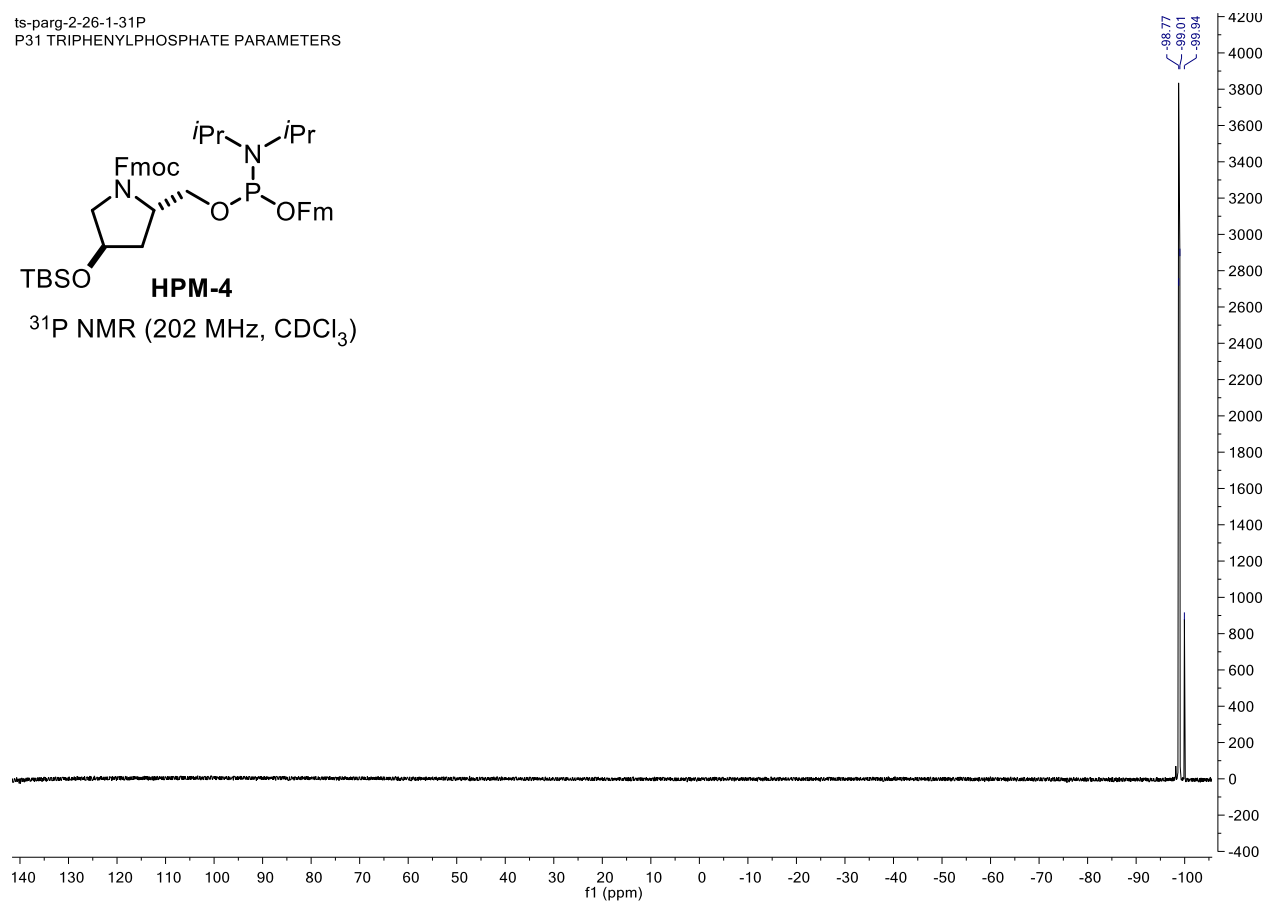

ts-parg-3-38-5  
STANDARD PROTON PARAMETERS

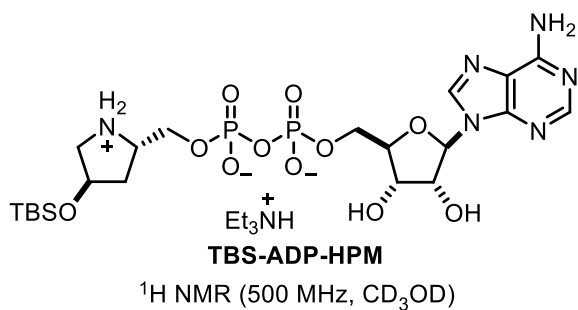

<sup>1</sup>H NMR (500 MHz, CD<sub>3</sub>OD)

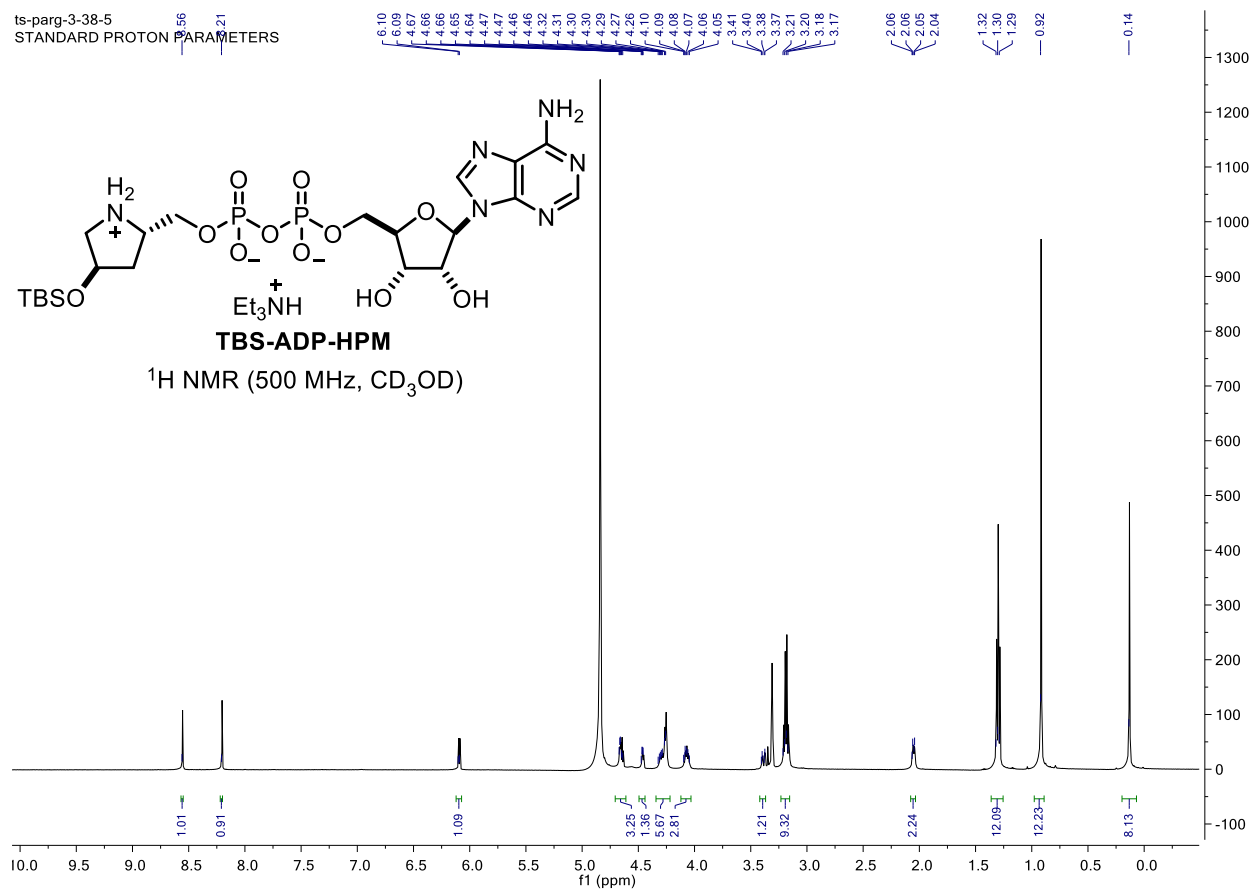

ts-parg-2-168-1-13C  
STANDARD CARBON PARAMETERS

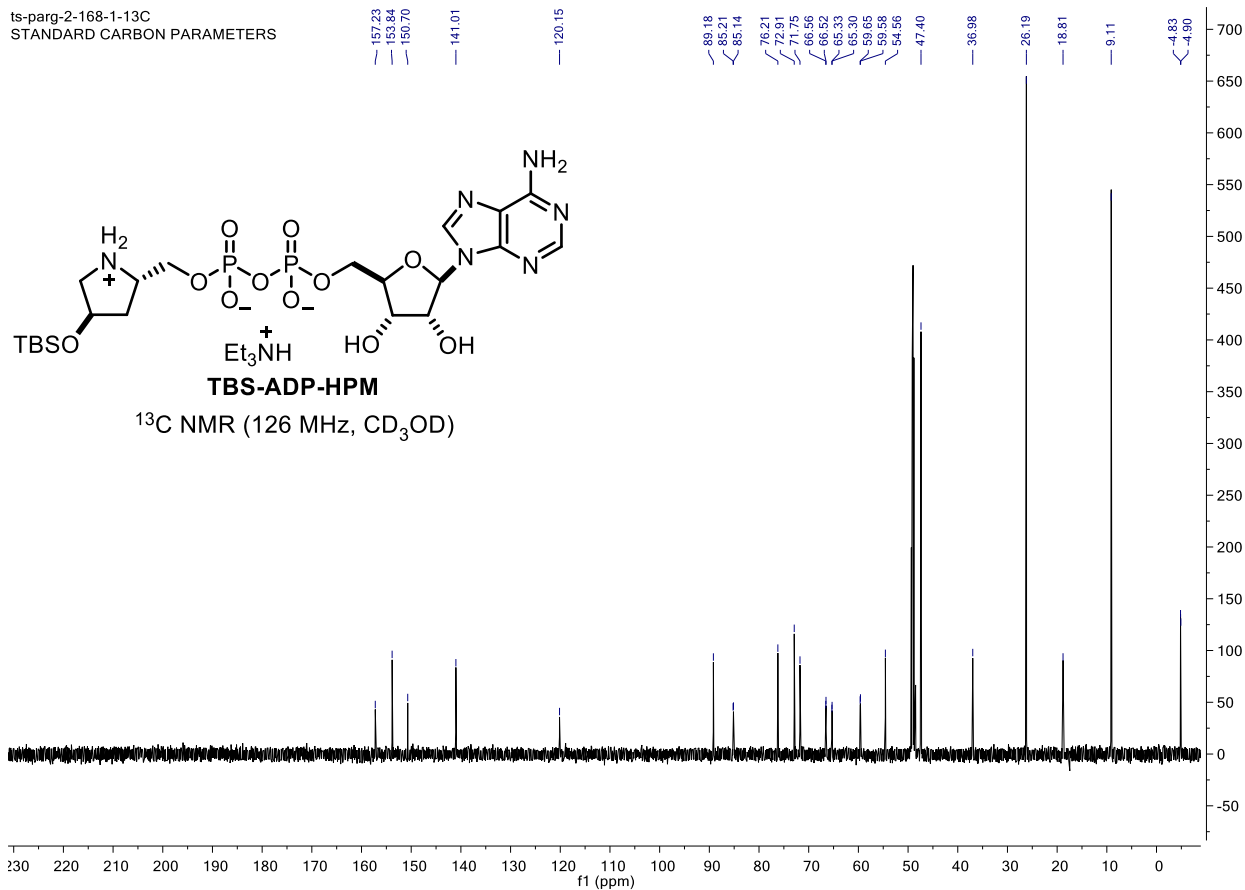

ts-parg-2-168-1-31P  
P31 TRIPHENYLPHOSPHATE PARAMETERS

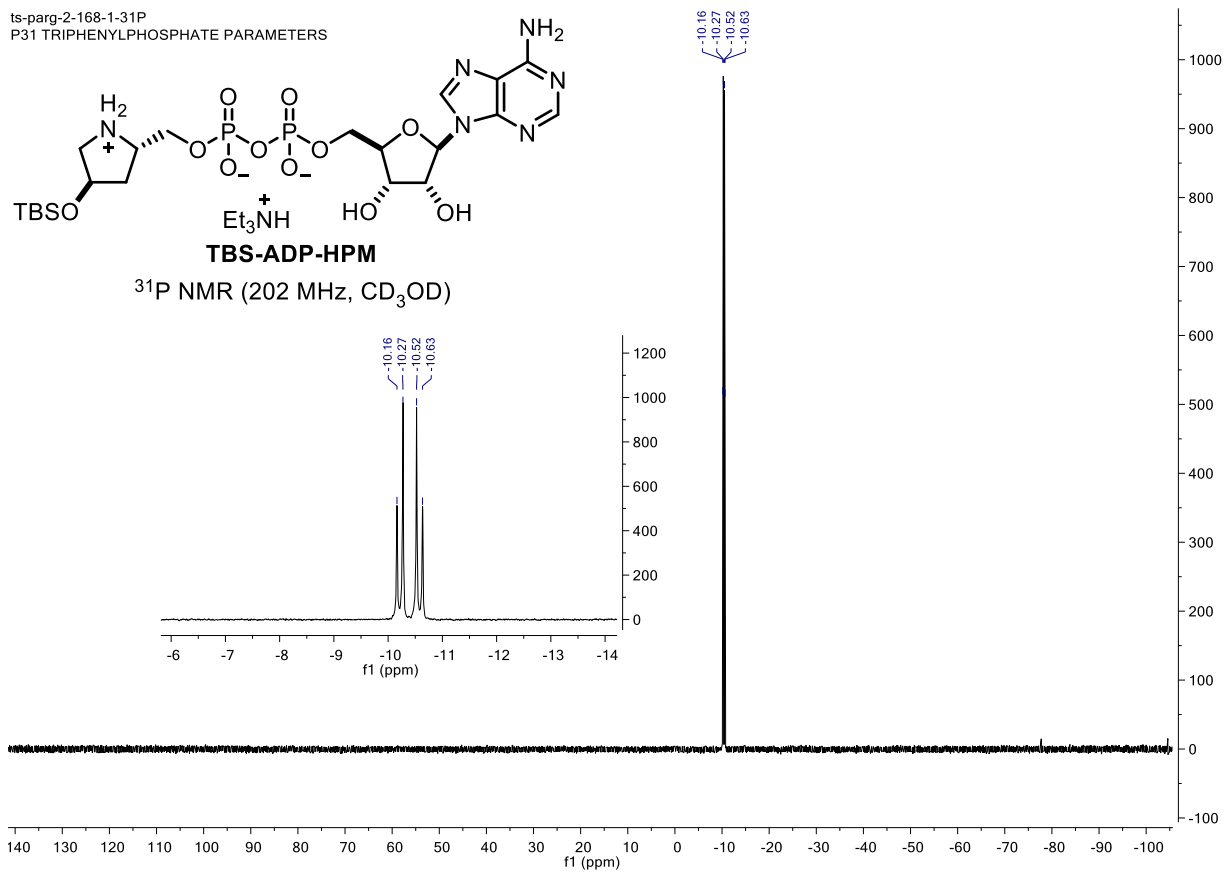

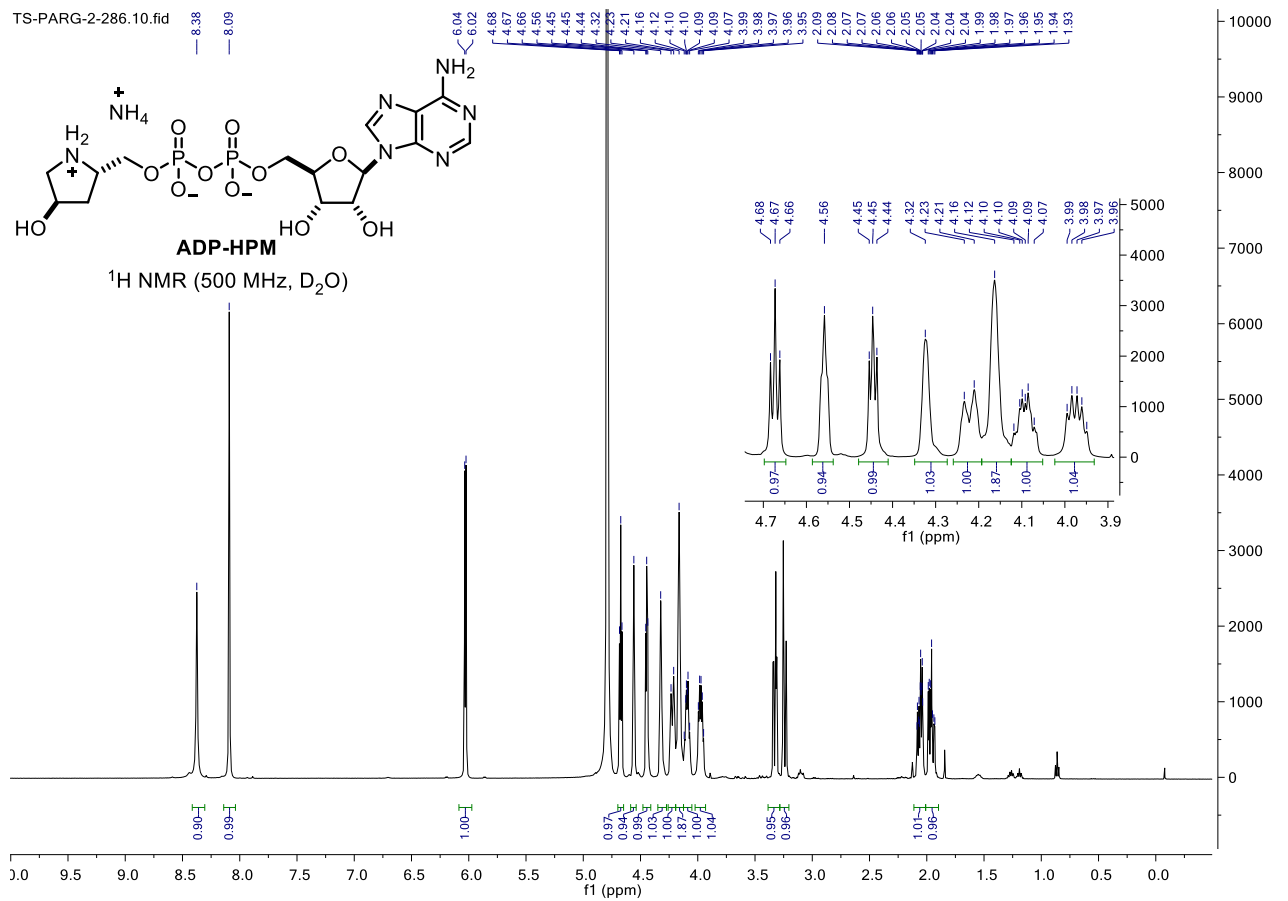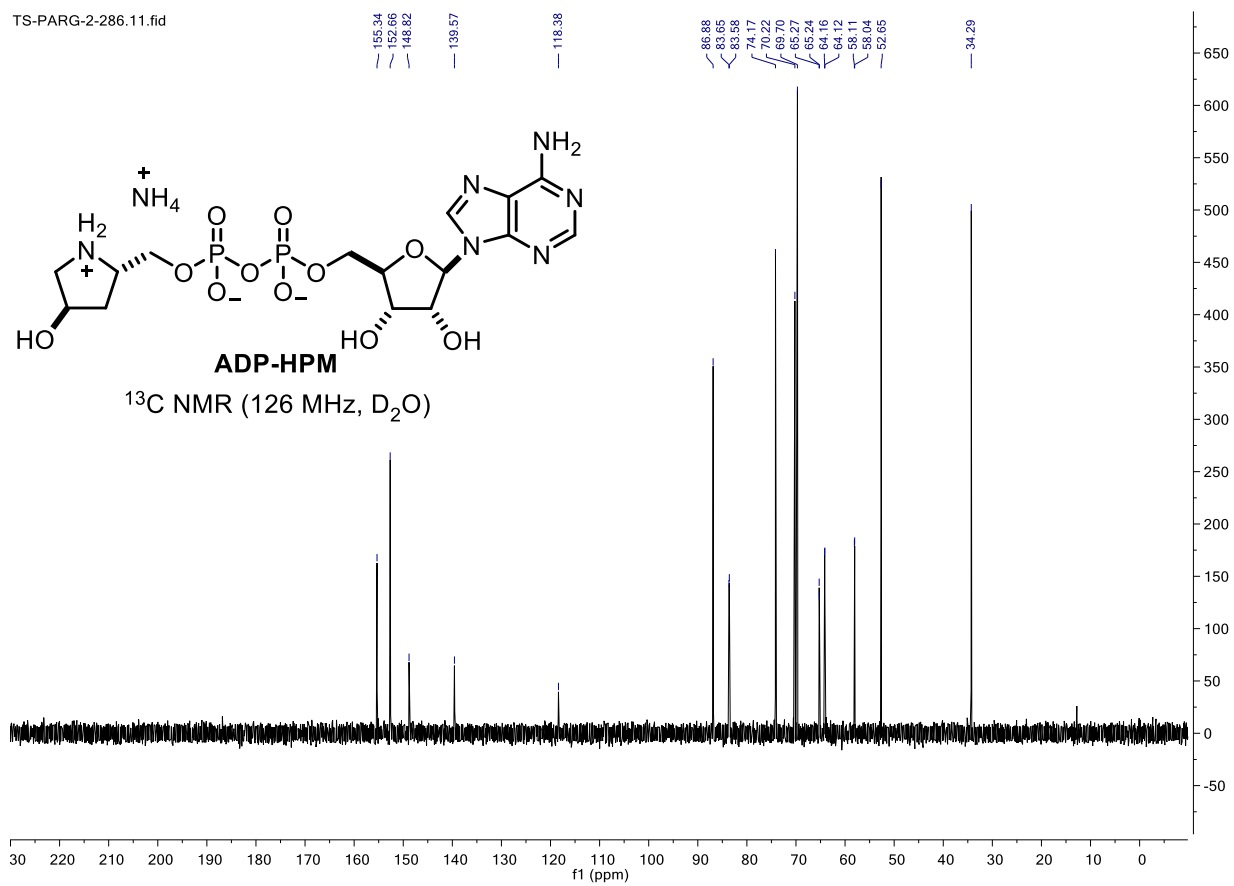

TS-PARG-2-286.12.fid

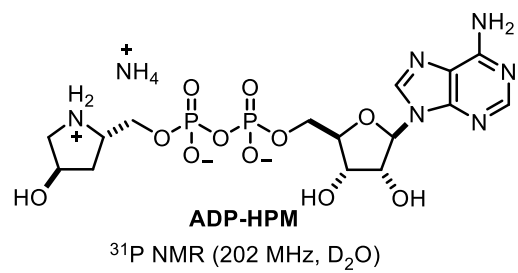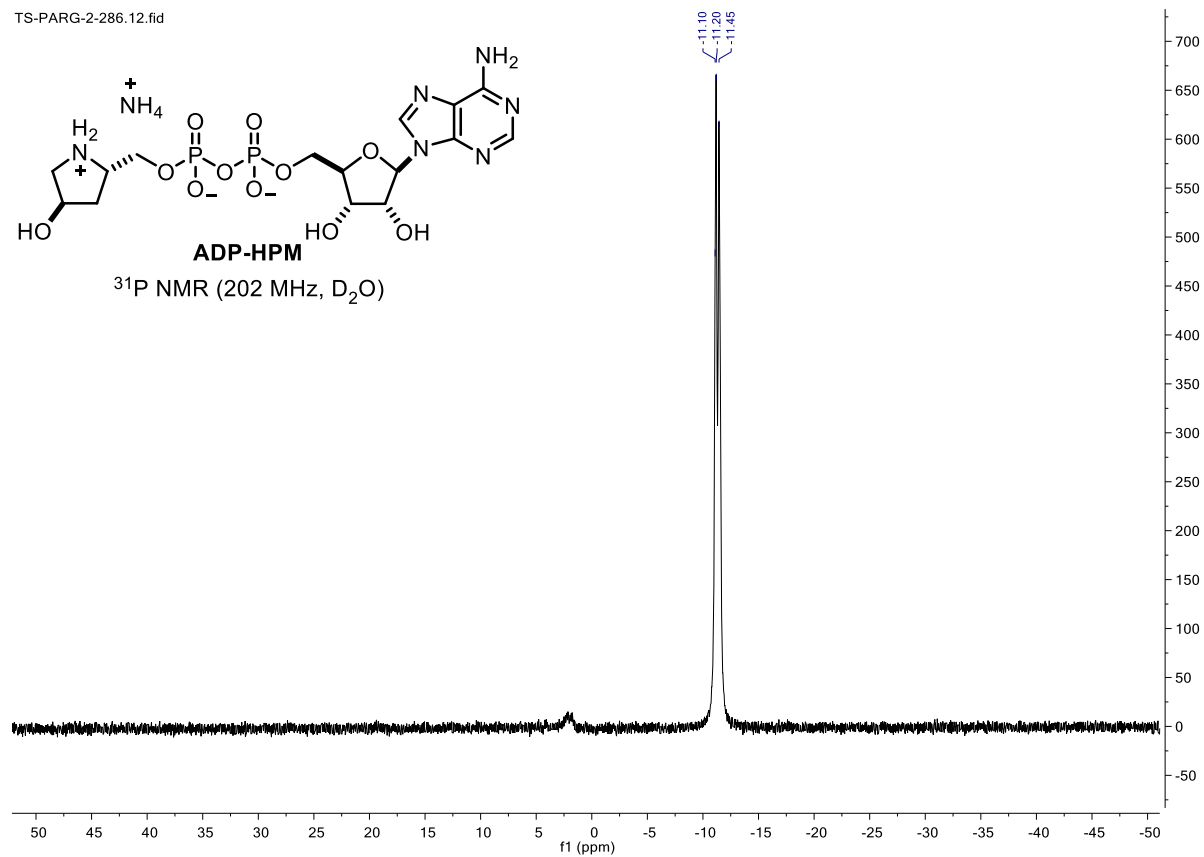



# NMR spectra concerning the synthesis of ADP-HPD

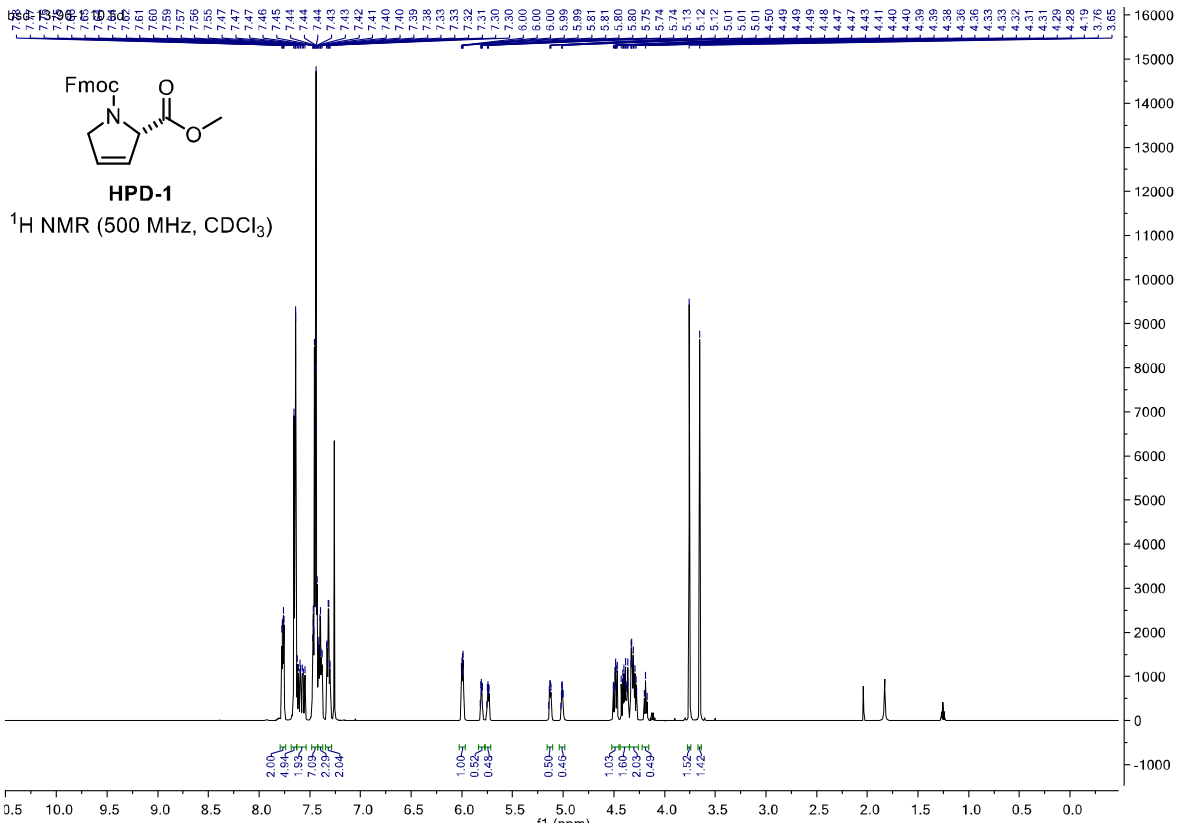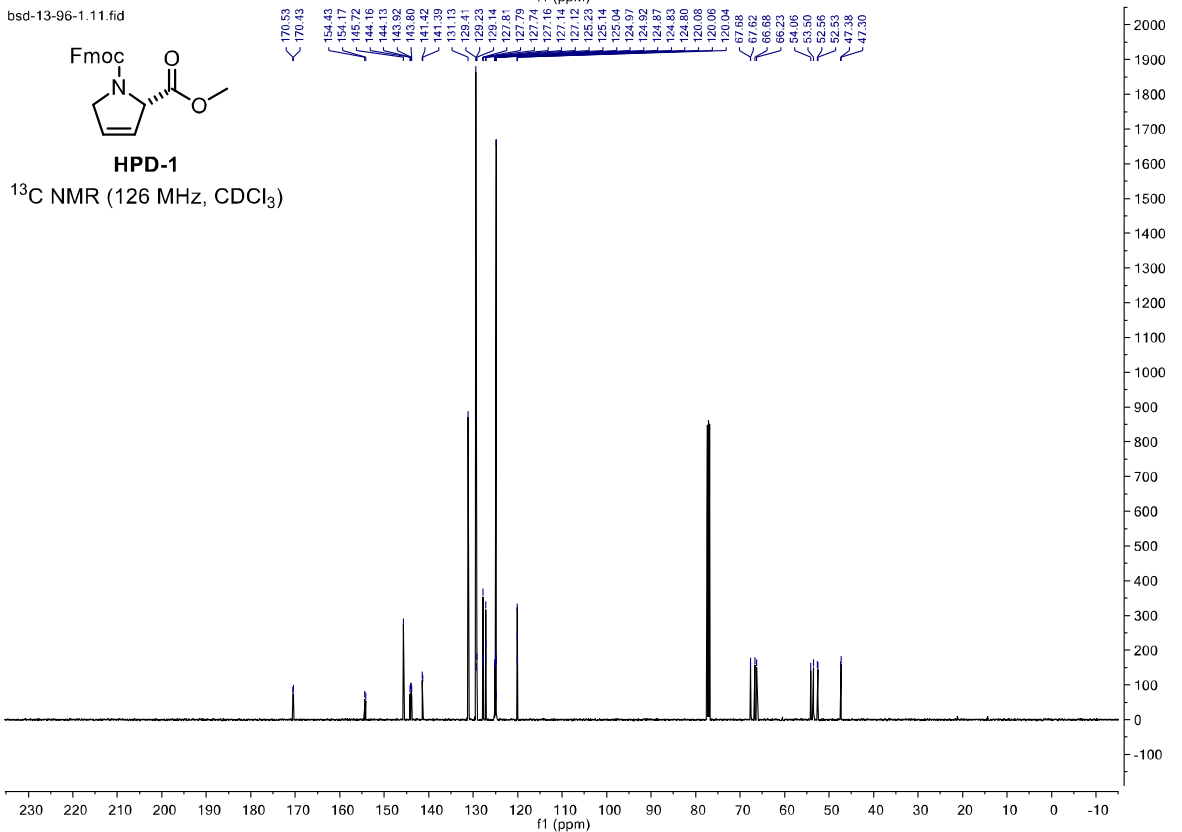



bsd-13-104-1.10.fid

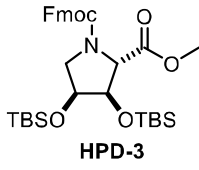

<sup>1</sup>H NMR (500 MHz, CDCl<sub>3</sub>)

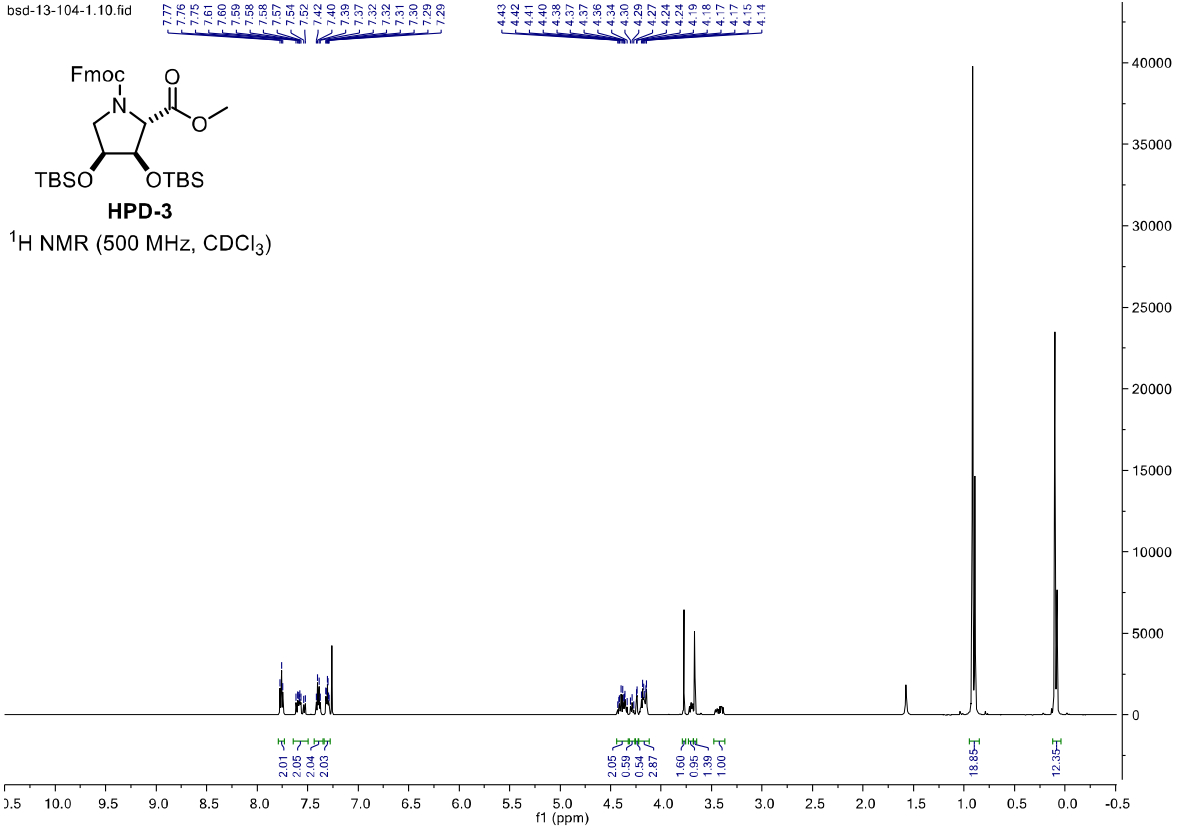

bsd-13-104-1.11.fid

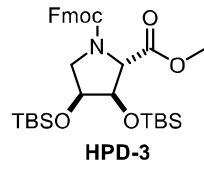

<sup>13</sup>C NMR (126 MHz, CDCl<sub>3</sub>)

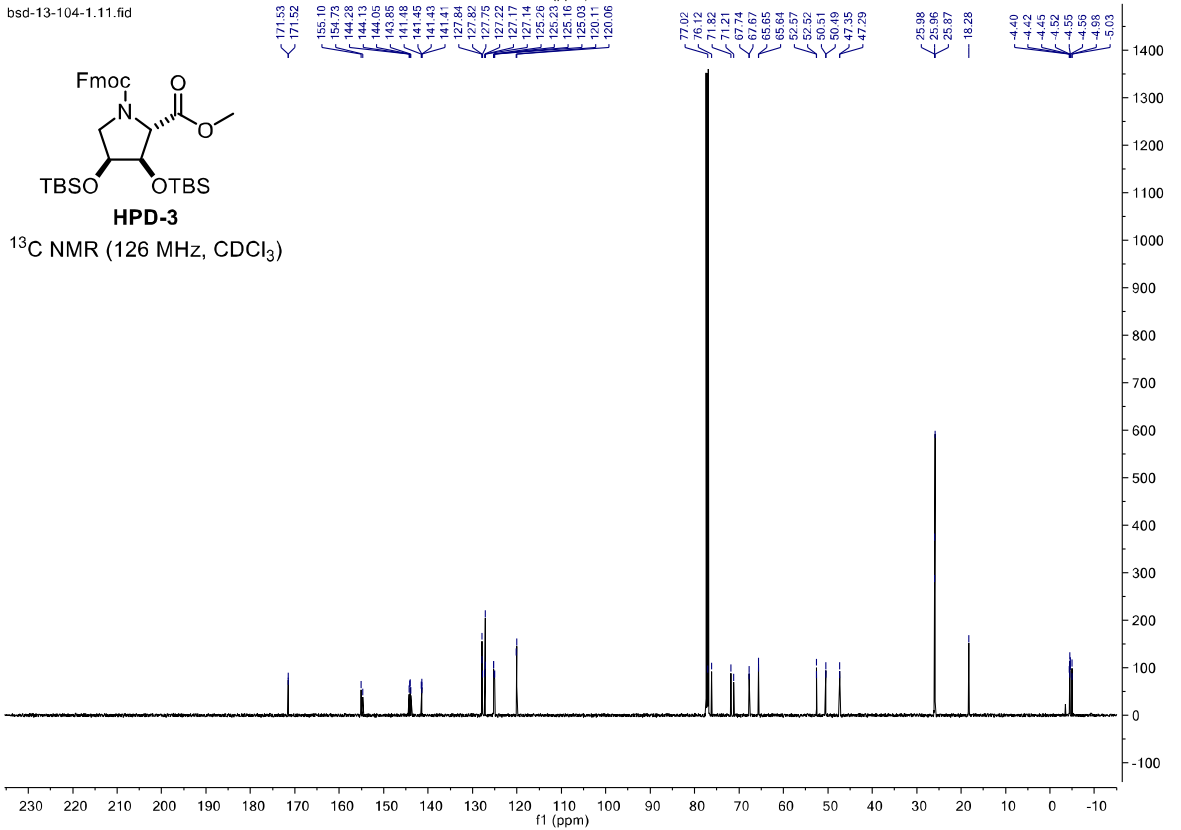

bsd-13-106.10.fid

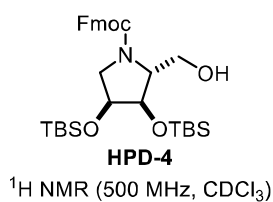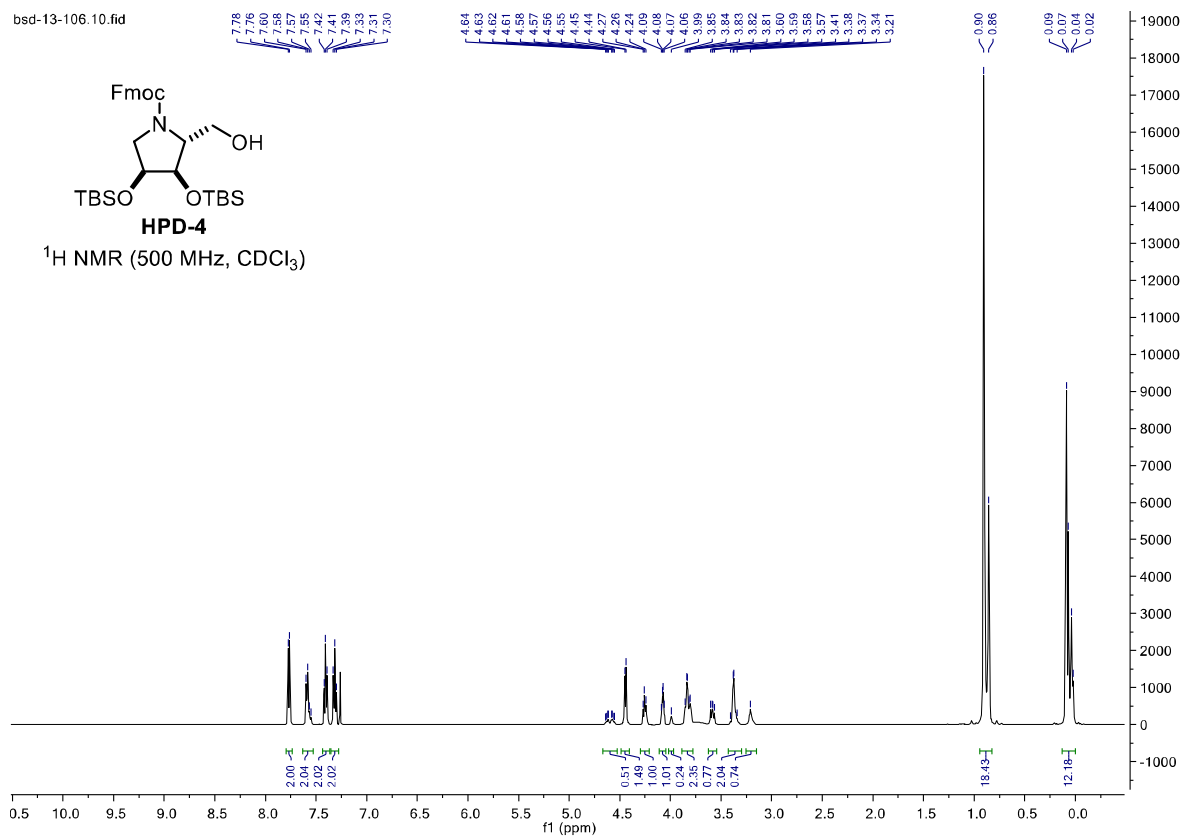

bsd-13-106.11.fid

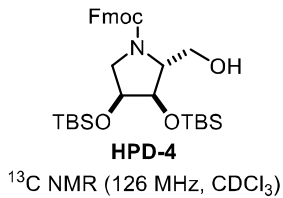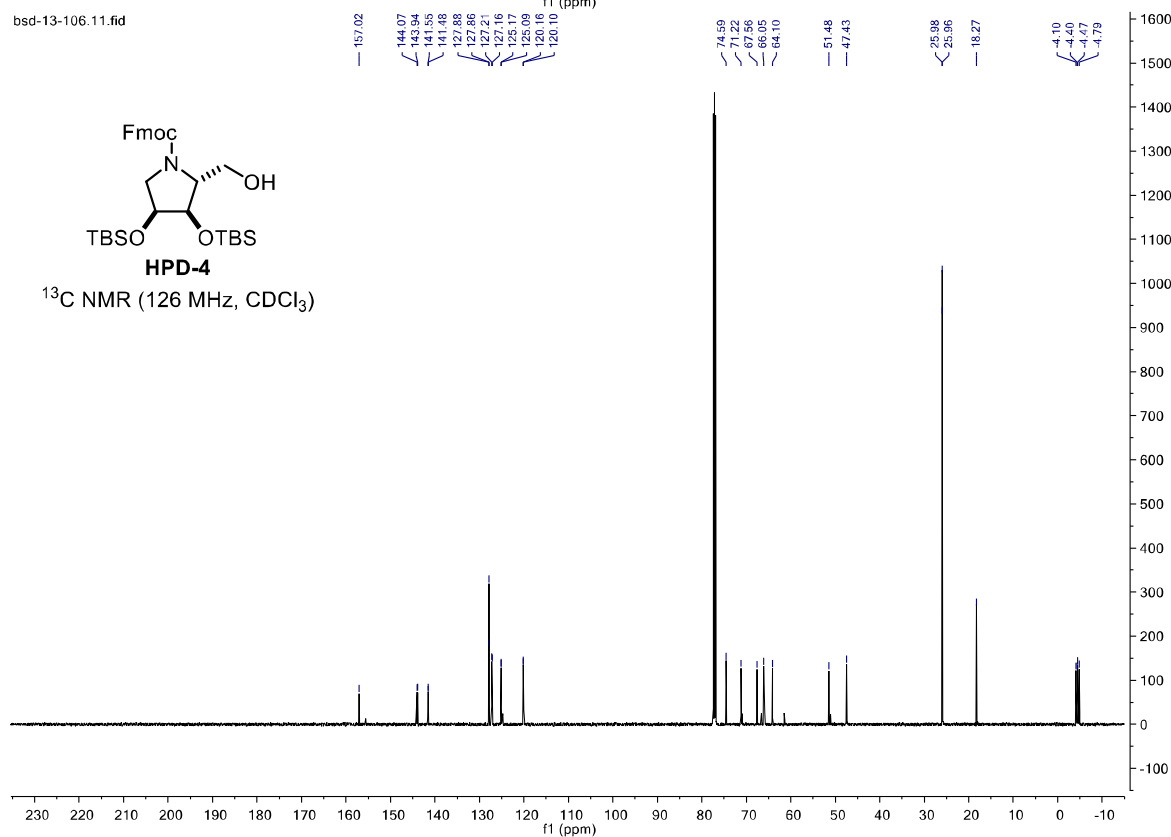



180529\_bsd-13-80\_31P

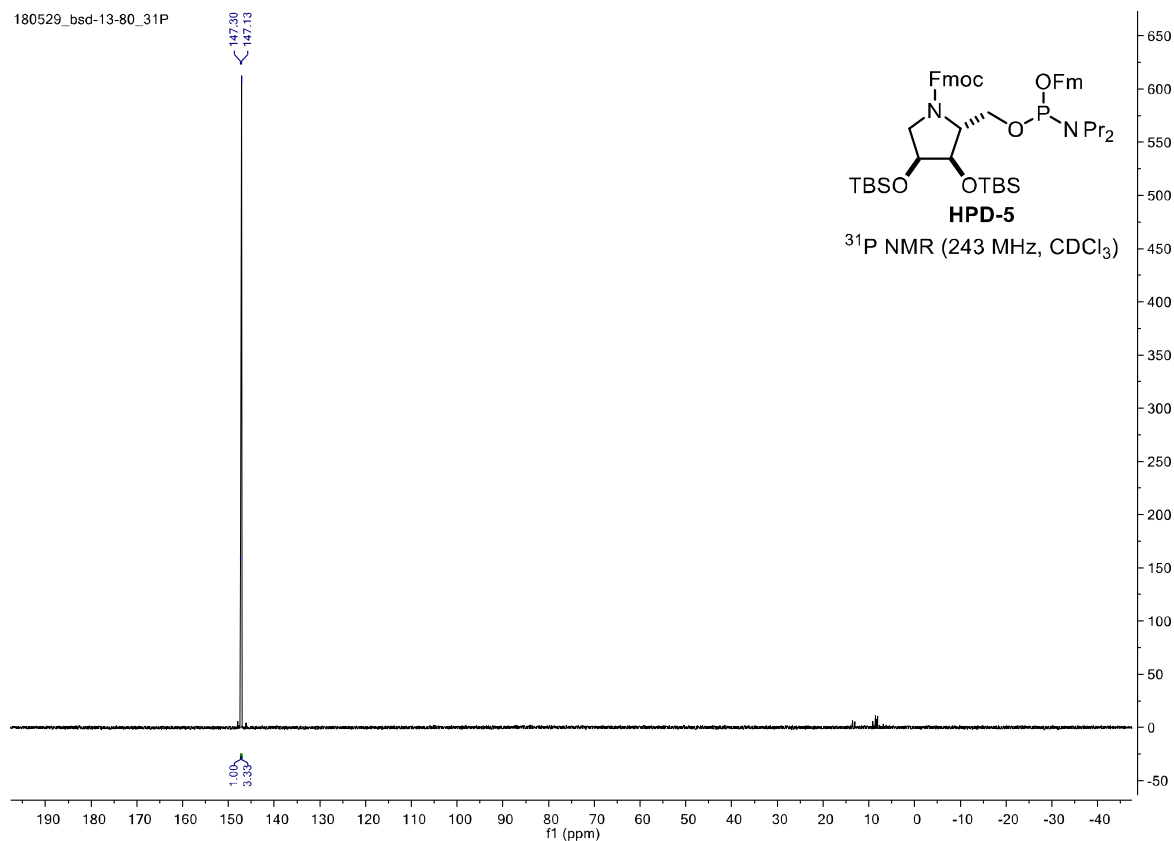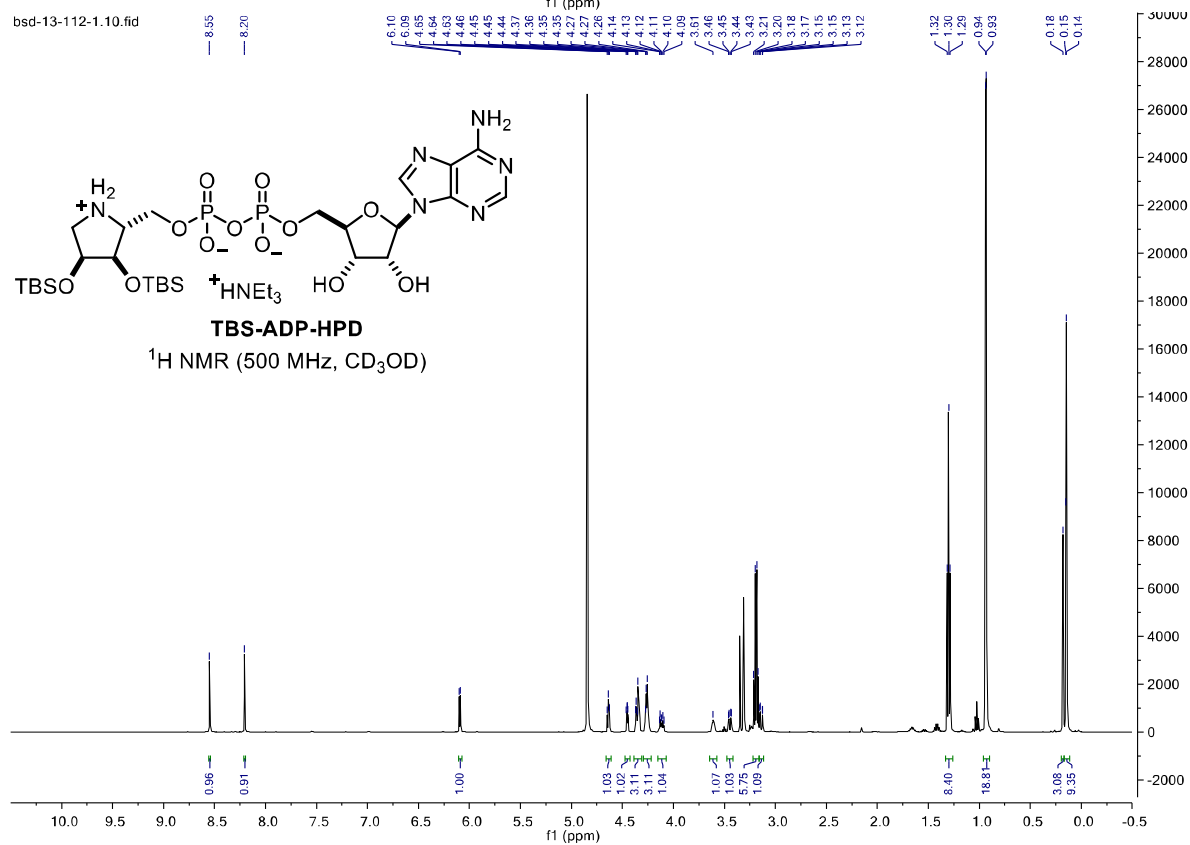

bsd-13-112-1.12.fid

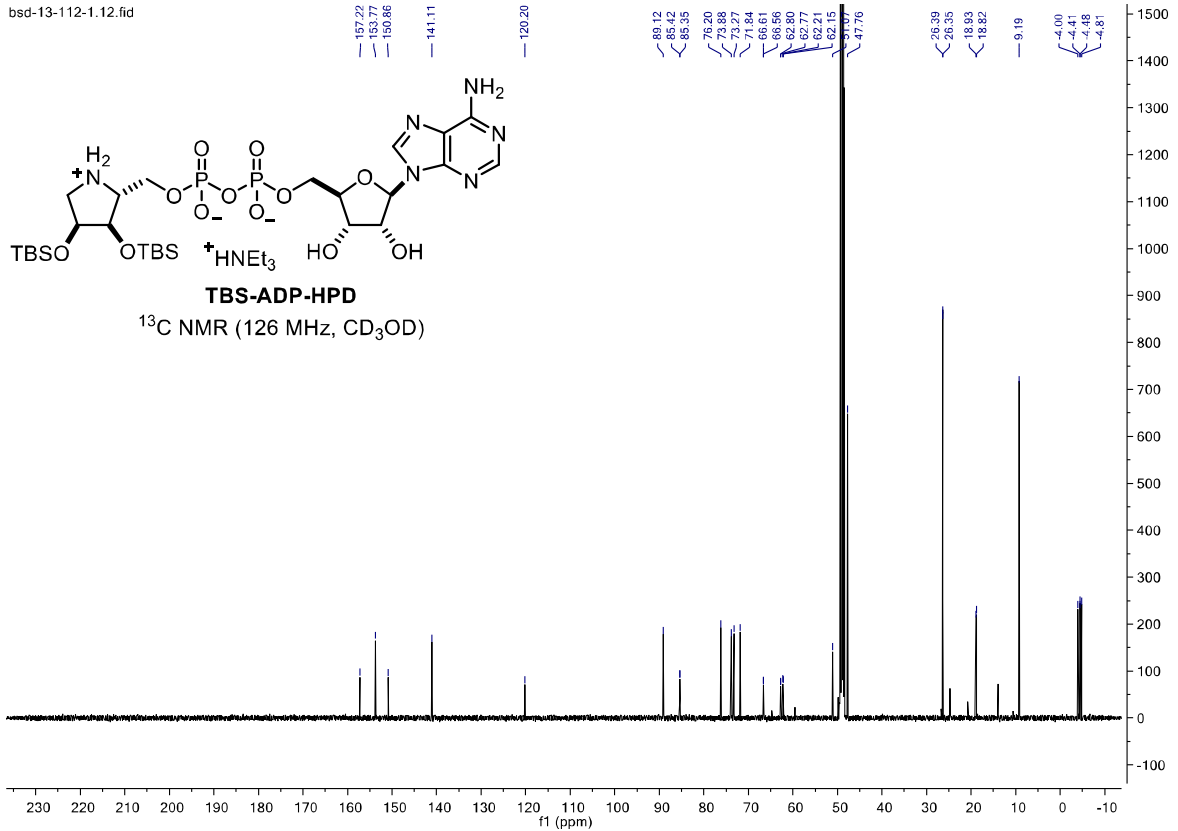

bsd-13-112-1.11.fid

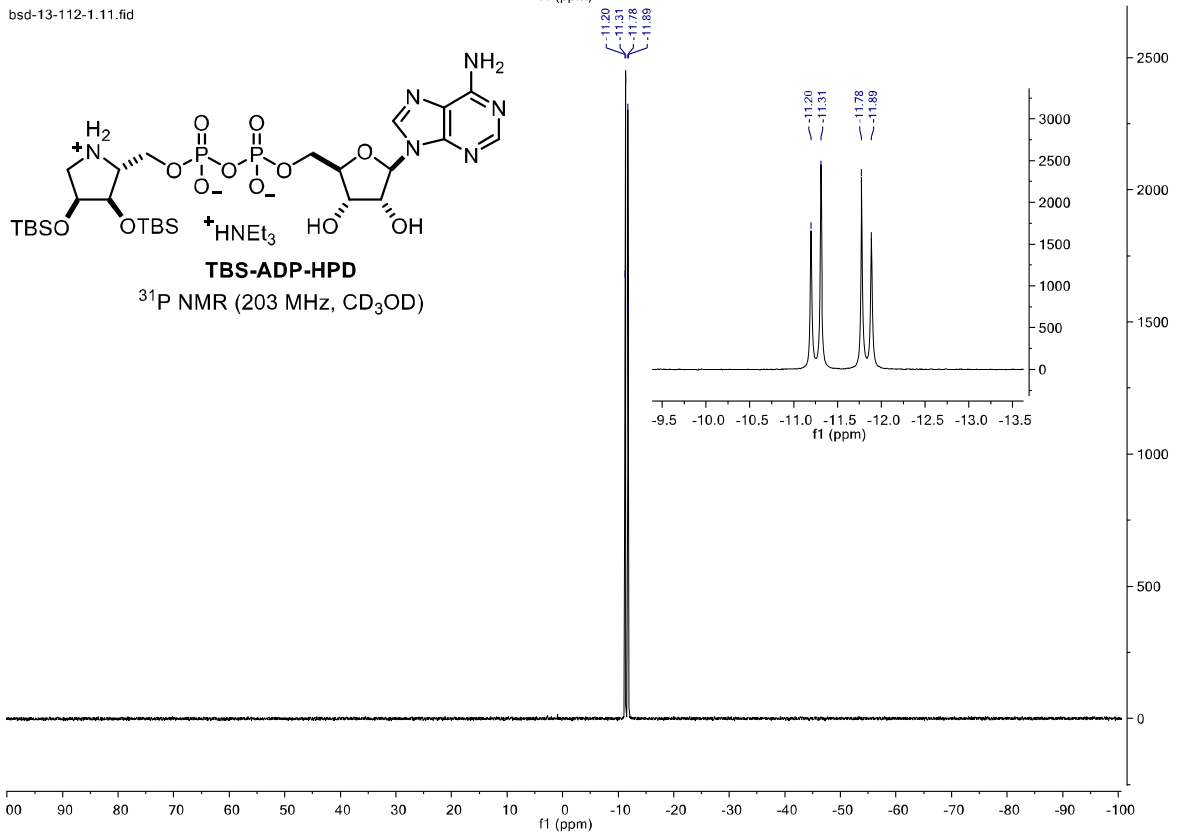

180617\_bsd-13-114-2\_1H

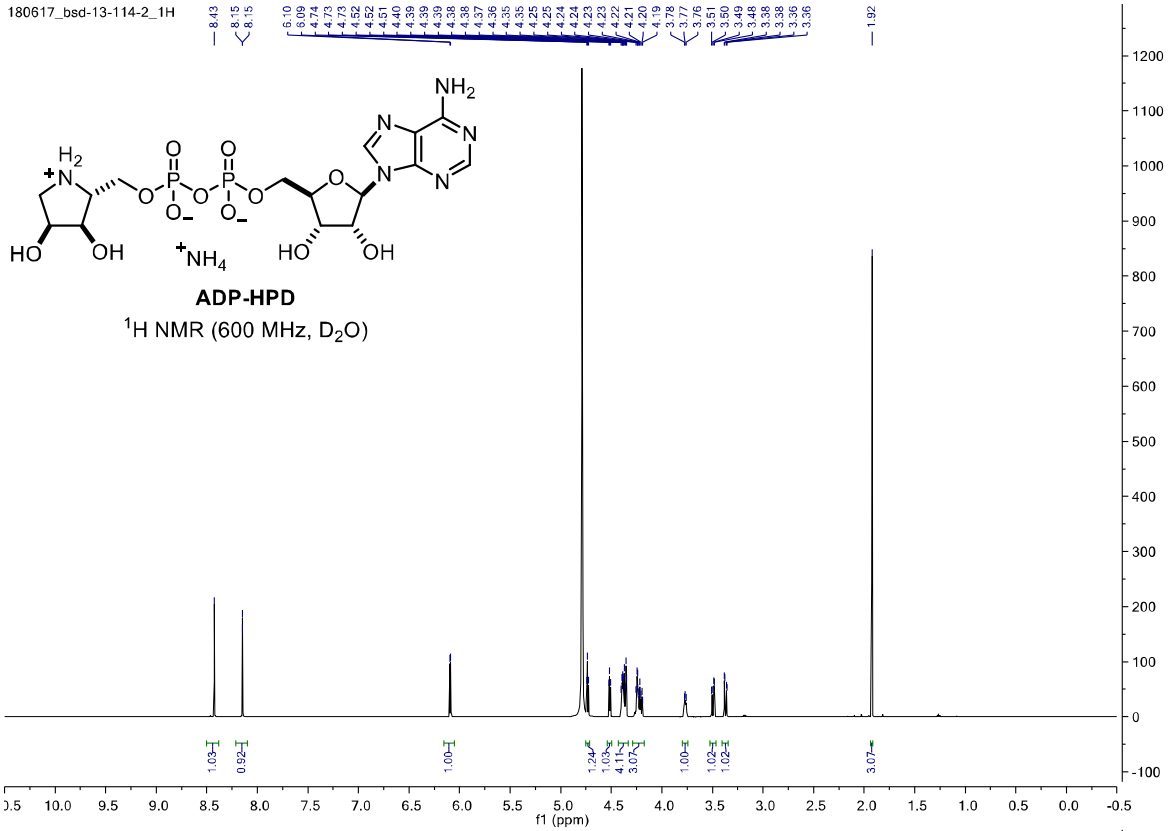

bsd-13-114-2.12.fid

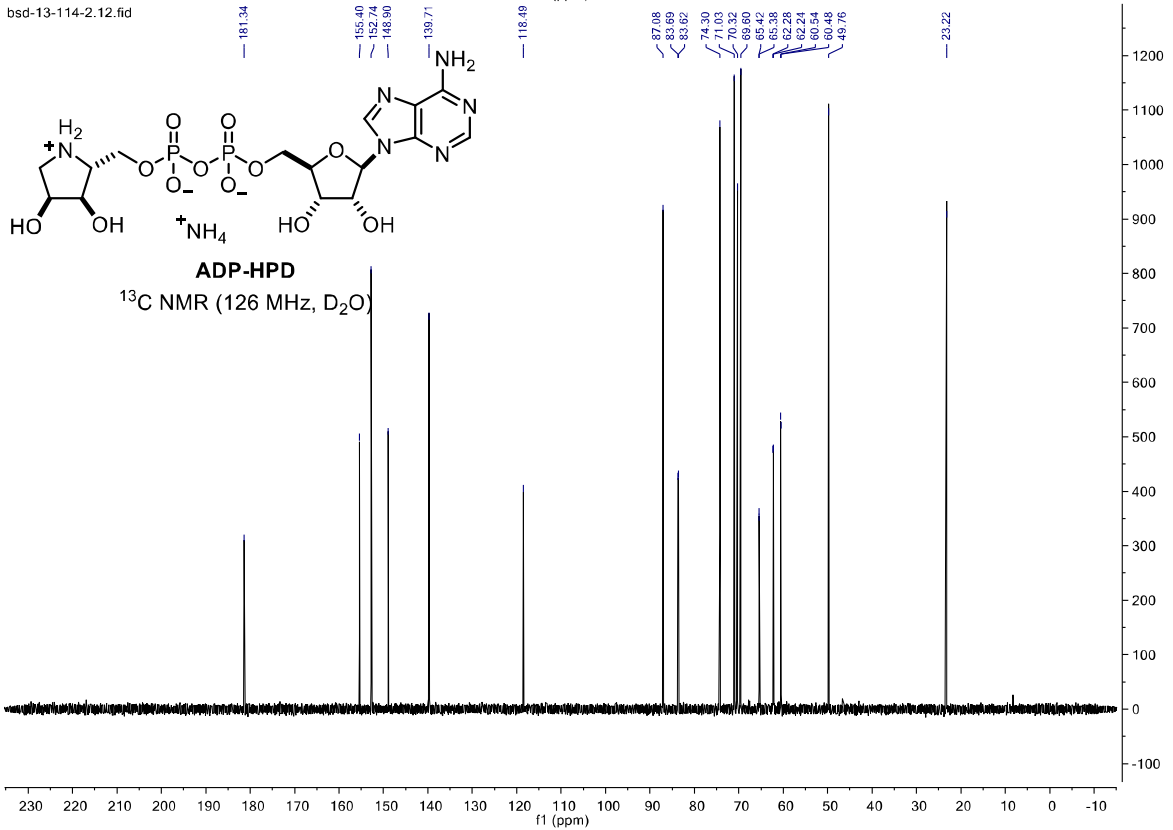



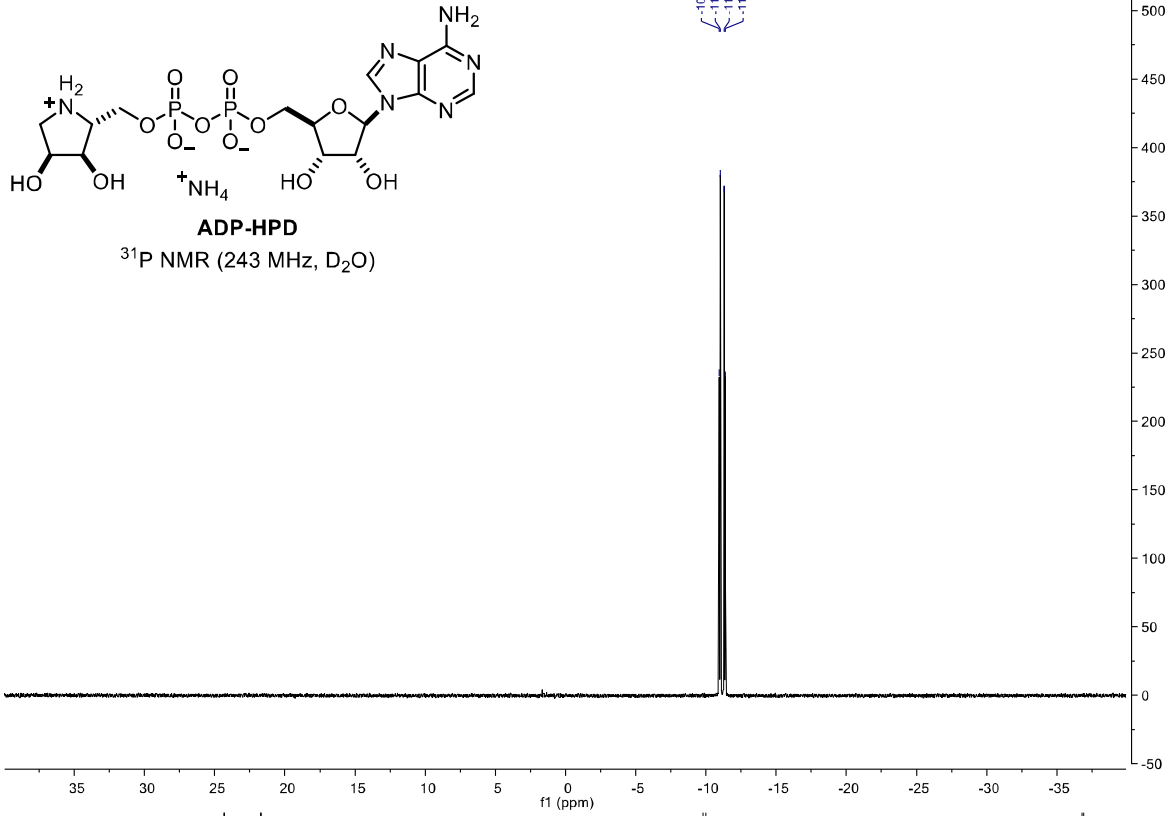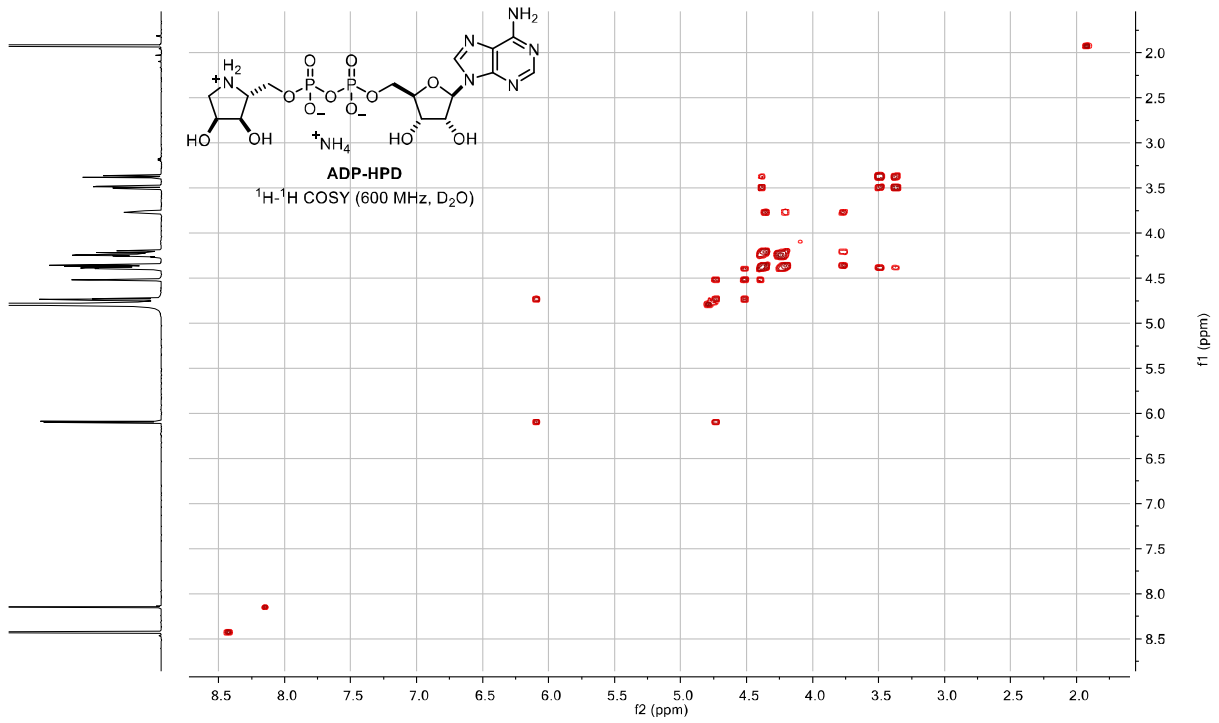

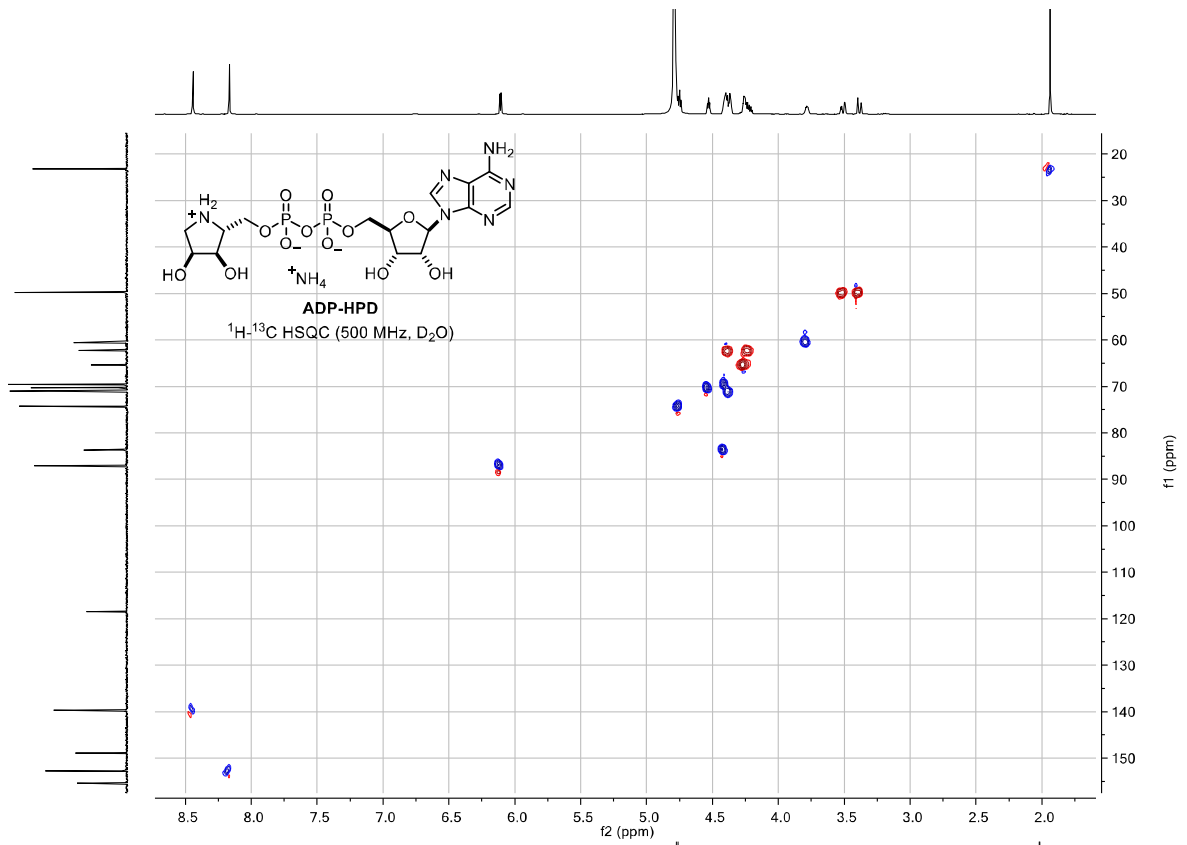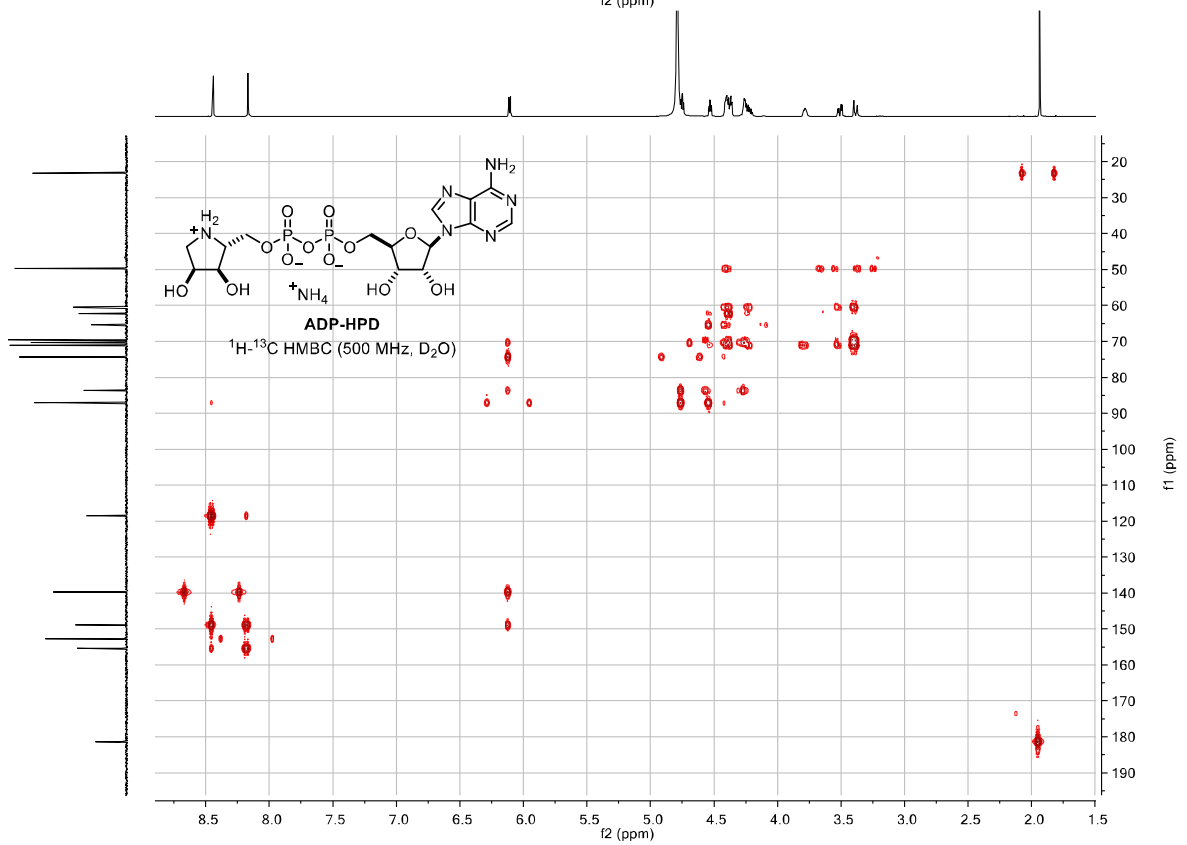

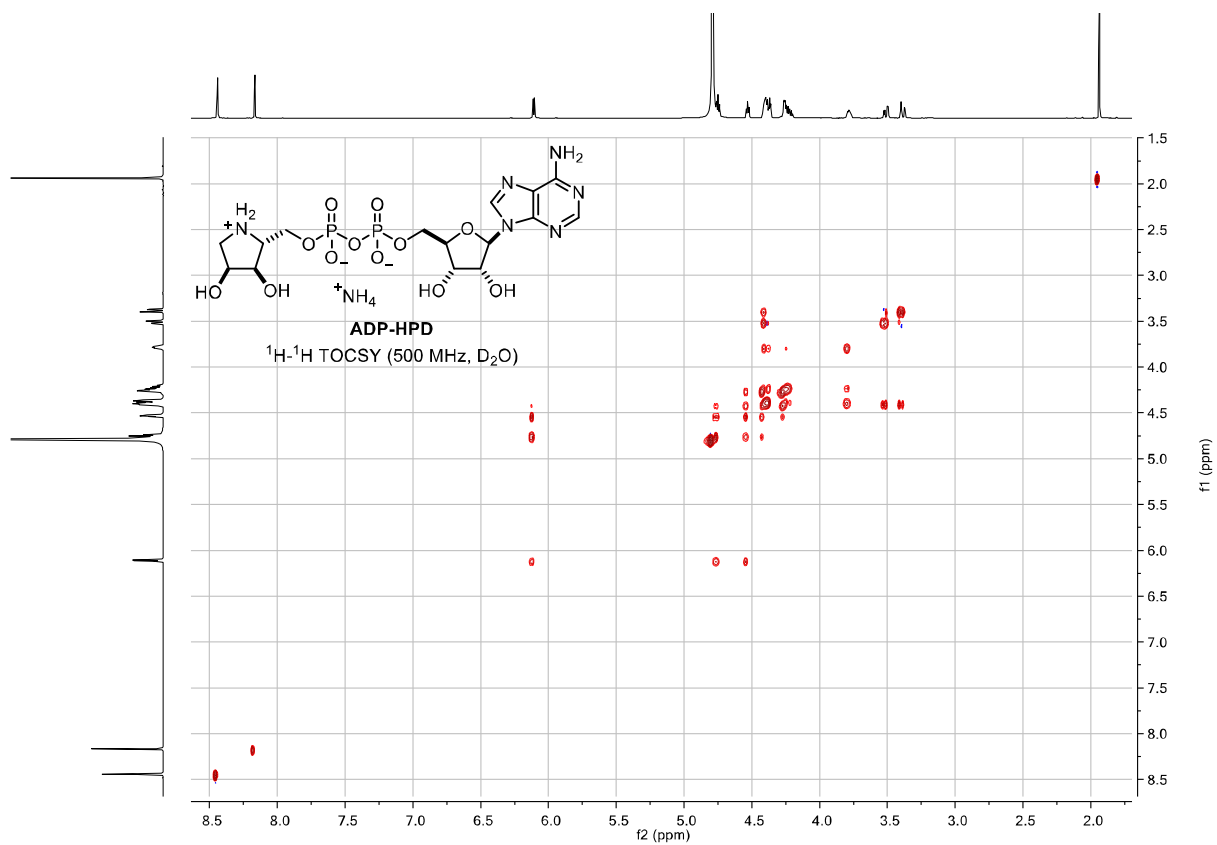

Supplement: mmc2.pdf [file mmc2.pdf]
